1        **Forest Dormouse (*Dryomys nitedula*) populations in southern Italy belong to a deeply divergent**  
2        **evolutionary lineage**

3  
4        Bisconti R.<sup>1\*</sup>, Aloise G.<sup>2</sup>, Siclari A.<sup>3</sup>, Fava V.<sup>4</sup>, Provenzano M<sup>4</sup>, Chiocchio A.<sup>1</sup>, Nascetti G. <sup>1</sup>, Canestrelli  
5        D. <sup>1</sup>

6  
7  
8  
9        <sup>1</sup>Department of Ecological and Biological Science, Università degli Studi della Tuscia, I-01100 Viterbo,  
10        Italy

11        <sup>2</sup>Museo di Storia Naturale ed Orto Botanico, Università della Calabria. Via Savinio s.n.c., Edificio  
12        Polifunzionale, I - 87036 Rende (CS), Italy

13        <sup>3</sup>Parco Nazionale dell'Aspromonte, Via Aurora, 1, I-89057 Gambarie di S. Stefano in Aspromonte (RC),  
14        Italy

15        <sup>4</sup>Associazione Ge.Co. Largo S. Antonio 12, I-88046 Lamezia Terme (CZ), Italy

16        \*Corresponding author: Roberta Bisconti; email address: bisconti@unitus.it

17  
18  
19        **Running title:** An endemic Forest Dormouse in southern Italy

20

21

22        **Abstract**

23        The Forest Dormouse (*Dryomys nitedula*) is a small rodent with a wide, albeit severely fragmented  
24        distribution, ranging from central Europe to central Asia. Within the Italian region, *D. nitedula*  
25        populations are restricted to forested mountain areas of two largely disconnected regions, the eastern Alps  
26        and the Calabria region, where two distinct subspecies (*D. nitedula intermedius* and *D. nitedula*  
27        *aspromontis*, respectively) have been described on the basis of phenotypic characters (i.e., fur colour).  
28        Here we analysed *D. nitedula* samples from both regions, to investigate patterns of genetic divergence  
29        and phylogenetic relationship among these two populations. Genetic variation was studied at the level of  
30        one mitochondrial (cytochrome b gene) and three nuclear gene fragments (exon1 of the interstitial  
31        retinoid-binding protein, exon 10 of the growth hormone receptor, and recombination activating gene 1).  
32        Phylogenetic analyses were performed using Maximum Likelihood and Bayesian inference methods. *D.*  
33        *n. aspromontis* and *D. n. intermedius* were found to be reciprocally monophyletic in all the phylogenetic  
34        analyses, and the genetic divergence observed between them at the mitochondrial *CYTB* gene was  
35        conspicuous (HKY: 0.044) when compared to previously observed values among many sister species of  
36        rodents. Our results clearly show that *D. nitedula aspromontis* is a deeply divergent, narrow endemic  
37        evolutionary lineage, and its conservation needs should be carefully evaluated in the near future.  
38        Moreover, such deep genetic divergence, together with phenotypic differentiation between *D. n.*  
39        *intermedius* and *D. n. aspromontis*, suggest that *D. nitedula* populations in southern Italy might belong to  
40        a distinct, previously unrecognized species.

41

42        **Keywords:** *Dryomys nitedula*, Forest Dormouse, Southern Italy, genetic divergence.

## 43 Introduction

44 The Italian Peninsula has long been identified as a major component of the Western Mediterranean  
45 biodiversity hotspot, and as an important glacial refugium for temperate animal species throughout the  
46 Plio-Pleistocene (Hewitt, 2011). The advent and extensive application of genetic markers to the study of  
47 geographic variation have much improved our understanding of key biogeographic patterns and historical  
48 processes within this area, revealing expansion-contraction dynamics, population fragmentations into  
49 multiple Pleistocene refugia, hidden hybrid zones, as well as the occurrence of a plethora of cryptic and  
50 deeply divergent evolutionary lineages (Barbanera et al., 2009; Canestrelli et al., 2006a, 2006b, 2007a,  
51 2007b, 2008a, 2010, 2012a, 2012b, 2014a, 2014b; Canestrelli and Nascetti, 2008; Castiglia et al., 2007,  
52 2016; Colangelo et al., 2012; Grill et al., 2009; Kindler et al., 2013; Lecocq et al., 2013; Lo Brutto et al.,  
53 2010; Louy et al., 2013; Maura et al., 2014; Mezzasalma et al., 2015; Nascetti et al., 2005; Salvi et al.,  
54 2013; Salvi et al., 2017; Simonsen and Huemer, 2014; Wauters et al., 2017).

55 The Forest Dormouse *Dryomys nitedula* (Pallas, 1778) is a small rodent with a wide, albeit  
56 fragmented geographic distribution, ranging from eastern and southern Europe to central Asia (Krystufek  
57 and Vohralik, 1994). Despite its wide distribution, current knowledge about its ecology and systematics is  
58 still scanty. The species has arboreal and nocturnal habits, and it has been observed from the sea level to  
59 above 2000 m a.s.l., within a wide variety of habitats, but with marked differences found among local  
60 populations (Krystufek and Vohralik, 1994; Paolucci et al., 1989; Amori et al., 2008). Together with the  
61 wide but geographically structured variation in body size, coat colour, and to a lesser extent morphology,  
62 these differences among local populations have led several authors to suggest possible occurrences of  
63 cryptic species within *D. nitedula* (Holden, 2005). Although a comprehensive investigation of its  
64 molecular systematic is still missing, the few data available seem to support this hypothesis (e.g.  
65 Grigoryeva et al., 2015), and indicate that cryptic divergent lineages may exist within this nominal  
66 species.

67 Within the Italian Peninsula, *D. nitedula* populations are restricted to forested mountain areas  
68 of two largely disconnected regions: eastern Alps and southern Italy (Aspromonte, Sila, and Pollino  
69 mountain massifs). However, this large distributional gap could have been narrower in the recent past.  
70 Fossil data suggested that the species occurred in central Italy, at least before the last glacial phase (65-35  
71 thousand years ago; see Kotsakis, 1991, 2003). Based on differences in coat colour patterns (Nehring,  
72 1902; Von Lehmann, 1964), the two populations from the eastern Alps and southern Italy have so far  
73 been described as two distinct subspecies *D. nitedula intermedius* Nehring, 1902 and *D. nitedula*

74 *aspromontis* Von Lehmann, 1964 respectively, with the latter showing a brighter grey fur and a  
75 distinctive white spot on the tip of the tail (Von Lehmann, 1964). In spite of extensive faunistic surveys in  
76 the Calabria region (Aloise and Cagnin, unpublished data), *D. n. aspromontis* individuals have hitherto  
77 been found only at altitudes above 1000 m a.s.l., and only within beech (*Fagus sylvatica*) dominated  
78 forests (Cagnin and Aloise, 1995), whereas along the Alps, the species has also been observed at lower  
79 altitudes, and mostly within mixed forests of broadleaf trees and conifers (Paolucci et al., 1989).  
80 However, cytogenetic and morphometric differences have not been observed between both subspecies  
81 (Civitelli et al., 1995; Filippucci et al., 1995), and a limited genetic differentiation has been reported  
82 based on preliminary allozyme data (Filippucci et al., 1995), leading to uncertainty about the correct  
83 taxonomic assignment of the populations in southern Italy (Amori et al., 2008).

84 In this study, we investigate patterns of genetic divergence between *D. n. aspromontis* and *D.*  
85 *n. intermedius* by analysing patterns of sequence variation at the level of one mitochondrial and three  
86 nuclear gene fragments. Our aim was to better characterize the phylogenetic relationships between the  
87 forest dormouse population in southern Italy and its conspecific populations in the north. In fact, given  
88 the large geographic gap among the subspecies, dispersal and gene exchange look rather implausible.  
89 Consequently, assessing whether *D. n. aspromontis* can be better defined as a marginally differentiated  
90 geographical isolate or as a unique evolutionary lineage might have major implications, not only for  
91 taxonomy but also of profound conservation value.

92

93

## 94 **Materials and Methods**

95 In total, 15 samples of *D. nitedula* were analysed (see Figure 1 and Table 1). Tail-tip samples of *D. n.*  
96 *aspromontis* (n = 8) were collected in the field since this species uses tail autotomy as an anti-predator  
97 behaviour (Mohr, 1941). Alternatively, tissue samples were also picked up from road-killed individuals.  
98 All samples were transported to the laboratory and stored in 95% ethanol until DNA extraction. Tissue  
99 samples of *D. n. intermedius* (n = 7) were kindly provided by the Science Museum of Trento (Muse) and  
100 Padova University as ethanol preserved specimens (see Table 1).

101 Whole genomic DNA was extracted using ZR universal kit (Zymo Research), following the  
102 standard DNA extraction protocol provided. Partial mitochondrial sequences of the cytochrome b gene  
103 (*CYTB*) were obtained using the following primers (Grigoryeva et al., 2015): F\_Dr.n\_cyt  
104 (TGACAAACATCCGTA AAACT) and R\_Dr.n\_int (AAAAGCGGGTTAGTGTTGC). Amplifications

105 by polymerase chain reaction (PCR) were performed with modifications from the original protocol  
106 (Grigoryeva et al., 2015): an initial denaturation step at 94°C for 3 minutes, followed by 30 repeated  
107 cycles of 94°C for 30 seconds, 54°C for 30 seconds and 72°C for 1 minute, and a single final step at 72°C  
108 for 5 minutes. Three nuclear gene fragments were amplified: exon1 interstitial retinoid-binding protein  
109 (*IRBP*), exon 10 of the growth hormone receptor (*GHR*), and a portion of recombination activating gene 1  
110 (*RAG1*). PCR primers used and cycling conditions were the same as presented in Pisano et al., 2015.  
111 Amplifications were carried out using identical PCR mixtures for all gene fragments analysed, including:  
112 20 ng of extracted DNA in a 25- $\mu$ L reaction mix containing MgCl<sub>2</sub> (2.5 mmol/L), the reaction buffer  
113 (1X; Promega), four dNTPs (0.2 mmol/L each), two primers (0.2  $\mu$ mol/L each), and the enzyme Taq  
114 polymerase (1 unit; Promega). PCR products were purified and sequenced by Macrogen Inc.  
115 (<http://macrogen.com>) using the ABI PRISM 3700 sequencing system.

116 The sequences obtained were visually checked by using CHROMAS 2.31 (Technelysium Ltd.),  
117 and they were aligned with CLUSTALX (Thompson et al., 1997) with the default settings. All the  
118 sequences obtained were deposited in the GenBank database (accession numbers: XXX-XXX [to be  
119 populated upon acceptance]). Sequences diversity and divergence patterns among sequences were  
120 evaluated using DIVEIN (Deng et al., 2010). Nuclear heterozygous sequences were phased using PHASE  
121 2.1 (Stephens et al., 2003) with the default options, whereas the occurrence of recombination was  
122 assessed using the pairwise homoplasy index (PHI statistic, Bruen et al., 2006) in SPLITSTREE v.4.11  
123 (Huson and Bryant, 2006).

124 The best-fit model of sequence evolution was selected for each analysed gene fragment among  
125 88 alternative models using the Bayesian Information Criterion (BIC) in JMODELTEST 2.1.3 (Darriba et  
126 al., 2012). This method suggested HKY as the best substitution model for the mitochondrial fragment  
127 (*CYTB*), HKY+I for the *IRBP* gene and JC+I for the *GHR* and *RAG1* genes.

128 Phylogenetic trees were estimated by means of the Maximum-Likelihood (ML) algorithm as  
129 implemented in PhyML program (Guidon et al., 2010), using default settings for all parameters, with the  
130 following exceptions: i) node support was assessed through a non-parametric bootstrap procedure based  
131 on 1000 pseudo-replicates ii) the best substitution model, as indicated by JMODELTEST, was used for  
132 each analysed marker. To check for consistency among different phylogenetic tree estimation procedures,  
133 phylogenetic trees were also estimated based on the Bayesian inference procedure (BI) by the  
134 MRBAYES v.3.2.1 software (Ronquist et al., 2012). For this purpose, four Monte Carlo Markov chains

135 were run for 10 million generations with trees sampled every 1000 generations, and the first 25% of the  
136 resulting trees discarded as a burn-in.

137

138

## 139 **Results**

140 For all the individuals analysed we obtained sequences of length 427 bp for the *CYTB* gene fragment, 889  
141 bp for *GHR*, 1216 for *IRBP*, and 826 bp for *RAG1*. The 427 bp mitochondrial region *CYTB* showed 21  
142 variable positions, 20 parsimony informative, whereas no indels, stop codons, and nonsense codons were  
143 observed. The *GHR* gene showed 18 variable positions of which 17 parsimony informative, the *IRBP*  
144 gene presented 29 variable positions of which 24 parsimony informative, and the *RAG1* gene showed 8  
145 variable positions of which 6 parsimony informative. The PHI test carried out with the nuclear gene  
146 fragments did not suggest statistically significant indications of recombination events.

147 Since phylogenetic trees inferred by means of ML and BI methods yielded fully congruent tree  
148 topologies, only results based on BI will be presented here (ML trees available upon request). As shown  
149 in Figure 1, for all the genetic markers analysed, tree topologies clearly identified samples belonging to  
150 *D. n. aspromontis* (southern Italy) and *D. n. intermedius* (north-eastern Italy) as two reciprocally  
151 monophyletic and well supported lineages, with no instances of common haplotype. Mean sequence  
152 divergence between haplotypes within each group was minimal, and below values observed between  
153 groups at all the markers analysed (see Table 2). The highest value of divergence estimated between both  
154 groups (HKY = 0.044; p-distance = 0.043) was observed at mtDNA gene fragment (*CYTB*).

155

156

## 157 **Discussion**

158 Studies of intraspecific diversity within the forest dormouse have almost entirely been based on  
159 phenotypic patterns of variation (but see e.g. Filippucci et al., 1995; Grigoryeva et al., 2015), and lead to  
160 the description of several subspecies within the nominal species *D. nitedula*. However, to what extent  
161 these phenotypic variants are in fact evolutionary independent lineages still remains largely unknown. In  
162 this study, we analysed the patterns of genetic divergence between the geographically isolated  
163 populations of forest dormouse in southern Italy (*D. n. aspromontis*), and their geographically closest  
164 population in north-eastern Italy (*D. n. intermedius*).

165 Our results clearly show that *D. n. aspromontis* is an independent evolutionary unit,  
166 monophyletic at all the markers analysed, and deeply divergent at the mtDNA from geographically the  
167 closest population in north-eastern Italy (HKY=0.044). These results seem to contradict with data from  
168 Filippucci et al. (1995), in which a rather low level of allozymic differentiation (D=0.03) was suggested.  
169 Nevertheless, while some discordance in terms of genetic diversity and differentiation patterns would not  
170 be surprising (Toews and Brelsford, 2012), a direct comparison between the two divergence estimates  
171 would be hardly meaningful. Indeed, given the fully allopatric distribution of the two lineages, a  
172 discussion of the possible discordance could only be based on a comparison of genetic distance metrics  
173 derived from distinct methodological approaches. Nonetheless, it is worth noting that while Filippucci  
174 and colleagues (1995) did not identify a single allozymic locus of fully diagnostic value between the  
175 subspecies, our results indicated a perfect reciprocal monophyly at the three nuclear loci studied, thus  
176 suggesting a lack of power resolution of the allozymic loci used by Filippucci and colleagues (1995).

177 During the data analysis, we refrained from using mtDNA for a molecular dating exercise  
178 because incomplete taxon sampling might strongly affect the resulting estimates (Poux et al., 2008;  
179 Nabhan and Sarkar, 2012), and our samples of *D. n. intermedius* was largely incomplete. Nevertheless,  
180 we cannot fail to notice that the sequence divergence observed at the *CYTB* between the northern and  
181 southern samples suggested a much older divergence for *D. n. aspromontis* than the mid-Holocene  
182 (approximately 10,000 years) or Late Pleistocene (35,000-65,000) as previously hypothesized based on  
183 morphological and fossil data, respectively (Roesler and Witte, 1968; Krystufek and Vohralik, 1994;  
184 Filippucci et al., 1995). In fact, using the mutation rate of 0.0217 mutations/site/million years recently  
185 estimated for the *CYTB* in mammals (Igea et al., 2015), the amount of sequence divergence we found  
186 suggested a divergence time between the subspecies around 1 million years ago (i.e. the Early  
187 Pleistocene), thus predated this event compared to previous estimates. Consequently, the single fossil  
188 record of *D. nitedula* found in central Italy (Kotsakis, 1991, 2003), might suggest a recent range  
189 contraction into southern Italy of a formerly 'peninsular' lineage, as already shown for a large amount of  
190 animal species in the area, (e.g. Canestrelli et al, 2006a; 2008; Grill et al., 2009; Castiglia et al., 2016;  
191 Colangelo et al., 2012) rather than a very recent (i.e. Late Pleistocene to mid-Holocene) colonization of  
192 southern Italy from the Alps as previously thought (Roesler and Witte, 1968; Krystufek and Vohralik,  
193 1994; Filippucci et al., 1995).

194 Our results have major implications for forest dormouse conservation in southern Italy. In fact,  
195 our results definitely identify this lineage as a unique evolutionarily significant unit (ESU, sensu Moritz,

196 1994), endemic to this geographic area and, to the state of knowledge, fragmented into three geographic  
197 isolates restricted to mountain tops above 1000 m a.s.l. in the Aspromonte, Sila, and Pollino mountain  
198 massifs. Further research is needed to assess the demographic consistency and patterns of genetic  
199 diversity of these isolates, and to better define the most appropriate management strategy of this narrow  
200 endemic lineage.

201 Finally, our results could also have a major taxonomic implication that might be critical for  
202 conservation and management, since priorities in conservation strategies are defined based on species  
203 status and species diversity (see e.g., the Convention on International Trade in Endangered Species of  
204 Wild Fauna and Flora (CITES) listed species; the IUCN red list of threatened species). Assigning  
205 allopatric populations to the species or subspecies rank based on the amount of genetic divergence might  
206 be problematic because patterns of reproductive isolation cannot be assessed in the field. Nevertheless,  
207 given the major theoretical and applied implications linked to the taxonomic rank, several attempts have  
208 been made in this regard either by exploring alternative definitions of the species concept or scanning  
209 literature for plausible threshold values of genetic divergence to assign a taxon to the species rank (for a  
210 perspective on mammals, see Baker and Bradley, 2006). In the case of *D. n. aspromontis*, the *CYTB*  
211 sequence divergence we found with respect to the closest population in north-eastern Italy, equals or even  
212 exceeds those observed among many sister species of mammals, and rodents in particular (see e.g.  
213 Michaux et al., 2002; Baker and Bradley, 2006; Wauters et al., 2017). Furthermore, *D. n. aspromontis*  
214 shows distinct morphological features, concerning unique coat colour pattern (see above). Accordingly,  
215 populations of the forest dormouse in southern Italy could in fact be assigned the species rank. In this  
216 case, *Dryomys aspromontis* Von Lehmann, 1964 would be available as the taxon name with a suitable  
217 common name as the Calabrian forest dormouse, since to the state of knowledge its current range is  
218 mostly restricted to this region. However, a note of caution is needed in the present case based on at least  
219 one major argument. The patterns of genetic diversity have not been investigated yet in *Dryomys nitedula*  
220 at the level of its entire range. Since there are several morphologically defined units (i.e. subspecies)  
221 stemming in geographical contiguity to one another within *Dryomys nitedula* from continental Europe to  
222 central Asia, a thorough examination of the associated patterns of genetic divergence and, most  
223 importantly, reproductive isolation might provide comparative yet important knowledge, in order to make  
224 better informed decisions about the correct taxonomic ranking of the southern Italian lineage as well.

225

226



227        **Acknowledgment**

228        We thanks to Luca Lapini and A. (Sasà) Pellegrino for kindly sharing photos, as well as Maria Chiara  
229        Deflorian (Science Museum of Trento, Muse), Paolo Paolucci (Padova University), and Antonio Mazzei  
230        (University of Calabria) for their help with sample collection and/or with laboratory procedures. This  
231        research was supported by grants from the Italian Ministry of Education, University and Research (PRIN  
232        project 2012FRHYRA), and from the Aspromonte National Park.

233

234  
235  
236  
237  
238  
239  
240  
241  
242  
243  
244  
245  
246  
247  
248  
249  
250  
251  
252  
253  
254  
255  
256  
257  
258  
259  
260  
261  
262  
263

## References

- Amori, G., Contoli, L., Nappi, A., 2008. Fauna d'Italia, Mammalia II: Erinaceomorpha, Soricomorpha, Lagomorpha, Rodentia, Calderini, Bologna.
- Baker, R. J., Bradley, R. D., 2006. Speciation in mammals and the genetic species concept. *J. Mammal.* 87(4): 643-662.
- Barbanera, F., Zuffi, M. A., Guerrini, M., Gentili, A., Tofanelli, S., Fasola, M., Dini, F., 2009. Molecular phylogeography of the asp viper *Vipera aspis* (Linnaeus, 1758) in Italy: evidence for introgressive hybridization and mitochondrial DNA capture. *Mol. Phylogenet. Evol.* 52(1): 103-114.
- Bruen, T. C., Philippe, H., Bryant, D., 2006. A simple and robust statistical test for detecting the presence of recombination. *Genetics* 172(4): 2665-2681.
- Cagnin M. and G. Aloise. 1995. Current status on Myoxids in Calabria (Southern Italy). Proc. II Conference on Dormice (Rodentia, Gliridae); *Hystrix*, (n.s.) 6 (1-2): 169-180
- Canestrelli, D., Nascetti, G., 2008. Phylogeography of the pond frog *Rana (Pelophylax) lessonae* in the Italian peninsula and Sicily: multiple refugia, glacial expansions and nuclear-mitochondrial discordance. *J. Biogeogr.*, 35: 1923-1936.
- Canestrelli, D., Bisconti, R., Nascetti, G., 2014b. Extensive unidirectional introgression between two salamander lineages of ancient divergence and its evolutionary implications. *Sci. Rep.* 4:6516.
- Canestrelli, D., Cimmaruta, R., Nascetti, G., 2007a. Phylogeography and historical demography of the Italian treefrog *Hyla intermedia* reveals multiple refugia, range expansions and secondary contacts within the Italian peninsula. *Mol. Ecol.* 16: 4808-4821.
- Canestrelli, D., Cimmaruta, R., Nascetti, G., 2008a. Population genetic structure and diversity of the Apennine endemic stream frog *Rana italica* - insights on the Pleistocene evolutionary history of the Italian peninsular biota. *Mol. Ecol.* 17: 3856-3872.
- Canestrelli, D., Sacco, F., Nascetti, G., 2012b. On glacial refugia, genetic diversity and microevolutionary processes: Deep phylogeographic structure in the Italian endemic newt *Lissotriton italicus*. *Biol. J. Linn. Soc.* 105: 42-55.
- Canestrelli, D., Verardi, A., Nascetti, G., 2007b. Genetic differentiation and history of populations of the Italian treefrog *Hyla intermedia*: lack of concordance between mitochondrial and nuclear markers. *Genetica* 130: 241-255.

- 264 Canestrelli, D., Zangari, F., Nascetti, G., 2006b. Genetic evidence for two distinct species within the  
265 Italian endemic *Salamandrina terdigitata* Bonnaterre, 1789(Amphibia: Urodela: Salamandridae).  
266 Herpetol. J.16: 221-227.
- 267 Canestrelli, D., Aloise, G., Cecchetti, S., Nascetti, G., 2010. Birth of a hot spot of intraspecific genetic  
268 diversity: notes from the underground. Mol. Ecol. 19: 5432-5451.
- 269 Canestrelli, D., Bisconti, R., Sacco, F., Nascetti, G., 2014a. What triggers the rising of an intraspecific  
270 biodiversity hotspot? Hints from the agile frog. Sci. Rep. 4:5042.
- 271 Canestrelli, D., Cimmaruta, R., Costantini, V., Nascetti, G., 2006a. Genetic diversity and phylogeography  
272 of the Apennine yellow-bellied toad *Bombina pachypus*, with implications for conservation. Mol.  
273 Ecol.15: 3741-3754.
- 274 Canestrelli, D., Salvi, D., Maura, M., Bologna, M.A., Nascetti, G., 2012a. One species, three Pleistocene  
275 evolutionary histories: Phylogeography of the Italian crested newt, *Triturus carnifex*. PLoSOne 7:  
276 e41754.
- 277 Castiglia R., Annesi F., Aloise G., G. Amori. 2007. Mitochondrial DNA reveals different genetic  
278 structures in the water shrews *Neomys anomalus* and *N. fodiens* (Insectivora: Soricidae) in Europe.  
279 J. Zool. Syst. Evol. Res. 45 (3): 255–262.
- 280 Castiglia, R., Aloise, G., Amori, G., Annesi, F., Bertolino, S., Capizzi, D., Mori, E., Colangelo, P., 2016.  
281 The Italian peninsula hosts a divergent mtDNA lineage of the water vole, *Arvicola amphibius* sl,  
282 including fossorial and aquatic ecotypes. Hystrix 27(2).
- 283 Civitelli, M. V., Filippucci, M. G., Kurtonur, C., Özkan, B., 1994. Chromosome analysis of three species  
284 of Myoxidae. Hystrix 6: 117-126.
- 285 Colangelo, P., Aloise, G., Franchini, P., Annesi, F., Amori, G., 2012. Mitochondrial DNA reveals hidden  
286 diversity and an ancestral lineage of the bank vole in the Italian peninsula. J. Zool. 287(1): 41-52.
- 287 Darriba, D., G. L. Taboada, R. Doallo, Posada. D., 2012. jModelTest 2: more models, new heuristics and  
288 parallel computing. Nat. Methods 9: 772.
- 289 Deng, W., Maust, B. S., Nickle, D. C., Learn, G. H., Liu, Y., Heath, L., Kosakovsky, Pond, S. L.,  
290 Mullins, J. I., 2010. DIVEIN: a web server to analyze phylogenies, sequence divergence, diversity,  
291 and informative sites. Biotechniques 48(5): 405.
- 292 Filippucci, M. G., Kryštufek, B., Simson, S., Kurtonur, C., Özkan, B., 1995. Allozymic and biometric  
293 variation in *Dryomys nitedula* (Pallas, 1778). Hystrix 6: 127-140.

- 294 Grigoryeva, O., Krivonogov, D., Balakirev, A., Stakheev, V., Andreychev, A., Orlov, V., 2015.  
295 Phylogeography of the forest dormouse *Dryomysnitedula* (Gliridae, Rodentia) in Russian Plain and  
296 the Caucasus. *Folia Zool.* 64(4): 361-364.
- 297 Grill, A., Amori, G., Aloise, G., Lisi, I., Tosi, G., Wauters, L. A., Randi, E., 2009. Molecular  
298 phylogeography of European *Sciurus vulgaris*: refuge within refugia?. *Mol. Ecol.*18(12): 2687-2699.
- 299 Guindon, S., Dufayard, J. F., Lefort, V., Anisimova, M., Hordijk, W., Gascuel, O., 2010. New algorithms  
300 and methods to estimate maximum-likelihood phylogenies: assessing the performance of PhyML  
301 3.0. *Syst. Biol.* 59(3): 307-321.
- 302 Hewitt, G. M., 2011. Mediterranean peninsulas: the evolution of hotspots. In: Zachos F.E., Habel J. C.  
303 (Eds.). *Biodiversity Hotspots Distribution and Protection of Conservation Priority Areas*. Springer  
304 Science & Business Media. 123-147.
- 305 Holden, M. E., 2005. Family Gliridae. In: Wilson D.E., Reeder D.A.M. (Eds.). *Mammal Species of the*  
306 *World. A Taxonomic and Geographic Reference*. Vol. 2. 3rd ed. John Hopkins University Press,  
307 Baltimore, MD, USA. 819–841.
- 308 Huson, D. H., Bryant, D., 2005. Application of phylogenetic networks in evolutionary studies. *Mol. Biol.*  
309 *Evol.* 23(2): 254-267.
- 310 Igea, J., Aymerich, P., Bannikova, A.A., Gosálbez, J., Castresana, J., 2015. Multilocus species trees and  
311 species delimitation in a temporal context: application to the water shrews of the genus *Neomys*.  
312 *BMC Evol. Biol.* 15: 209.
- 313 Juškaitis, R., 2014. Ecology of the forest dormouse *Dryomys nitedula* (Pallas 1778) on the north-western  
314 edge of its distributional range. *Mammalia*, 79(1): 33-41.
- 315 Kindler, C., Boehme, W., Corti, C., Gvoždík, V., Jablonski, D., Jandzik, D., Metallinou, M., Šíroký, P.,  
316 Fritz, U., 2013. Mitochondrial phylogeography, contact zones and taxonomy of grass snakes (*Natrix*  
317 *natrix*, *N. megalcephala*). *Zool. Scripta*, 42(5): 458-472.
- 318 Kotsakis, T., 1991. Late Pleistocene fossil microvertebrates of Grotta Breuil (Monte Circeo, Central  
319 Italy). *Quaternaria Nova* 1: 325-332.
- 320 Kotsakis, T., 2003. Fossil glirids of Italy: the state of the art. *Glíridos fósiles de Italia: situación*  
321 *actual*. *Coloquios Paleontol.* 1: 335-343.
- 322 Kryštufek, B., Vohralík, V., 1994. Distribution of the forest dormouse *Dryomys nitedula* (Pallas, 1779)  
323 (Rodentia, Myoxidae) in Europe. *Mammal. review* 24(4): 161-177.

- 324 Lecocq, T., Dellicour, S., Michez, D., Lhomme, P., Vanderplanck, M., Valterová, I., Rasplus, J.,  
325 Rasmont, P., 2013. Scent of a break-up: phylogeography and reproductive trait divergences in the  
326 red-tailed bumblebee (*Bombus lapidarius*). *BMC Evol. Biol.*13(1): 263.
- 327 Lo Brutto, S., Sara, M., Arculeo, M., 2010. Italian Peninsula preserves an evolutionary lineage of the fat  
328 dormouse *Glis glis* L. (Rodentia: Gliridae). *Biol. J. Linn. Soc.* 102(1): 11-21.
- 329 Louy, D., Habel, J. C., Ulrich, W., Schmitt, T., 2013. Out of the Alps: The Biogeography of a disjunctly  
330 distributed mountain butterfly, the Almond-eyed ringlet *Erebia alberganus* (Lepidoptera,  
331 Satyrinae). *J. Hered.* 105(1): 28-38.
- 332 Maura, M., Salvi, D., Bologna, M. A., Nascetti, G., Canestrelli, D., 2014. Northern richness and cryptic  
333 refugia: Phylogeography of the Italian smooth newt *Lissotriton vulgaris meridionalis*. *Biol. J. Linn.*  
334 *Soc.*113: 590-603.
- 335 Mezzasalma, M., Dall'Asta, A., Loy, A., Cheylan, M., Lymberakis, P., Zuffi, M. A., Tomovi, L., Odierna,  
336 G., Guarino, F. M., 2015. A sisters' story: comparative phylogeography and taxonomy of *Hierophis*  
337 *viridiflavus* and *H. gemonensis* (Serpentes, Colubridae). *Zool. Scripta* 44(5): 495-508.
- 338 Michaux, J. R., Chevret, P., Filippucci, M. G., Macholan, M., 2002. Phylogeny of the genus *Apodemus*  
339 with a special emphasis on the subgenus *Sylvaemus* using the nuclear IRBP gene and two  
340 mitochondrial markers: cytochrome b and 12S rRNA. *Mol. Phylogenet. Evol.* 23(2): 123-136.
- 341 Mohr, E., 1941. Schwanzverlust und Schwanzregeneration bei Nagetieren. *Zool. Anz.* 135: 49-65.
- 342 Moritz, C., 1994. Defining 'Evolutionarily Significant Units' for conservation. *Trends Ecol. Evol.* 9:373-  
343 375.
- 344 Nabhan, A. R., Sarkar, I. N., 2012. The impact of taxon sampling on phylogenetic inference: a review of  
345 two decades of controversy. *Brief. Bioinform.*13(1): 122-134.
- 346 Nascetti, G., Zangari, F., Canestrelli, D., 2005. The spectacled salamanders, *Salamandrina terdigitata*  
347 (Lacépède, 1788) and *S. perspicillata* (Savi, 1821): 1) genetic differentiation and evolutionary  
348 history. *Rendiconti Lincei: Scienze Fisiche e Naturali* 16:159-169.
- 349 Nehring, A. 1902. Über eine neue *Myoxus*-Species (*Myoxus intermedius* NHRG) aus Tirol. *Sitz. Ber. Ges.*  
350 *Naturforsch. Freunde Berlin*, 155-158.
- 351 Paolucci, P., Battista, A., De Battisti, R., 1989. The forest dormouse (*Dryomys nitedula* Pallas, 1779) in  
352 the Eastern Alps (Rodentia, Gliridae). *Biogeographia* 13: 855-866.

- 353 Pisano, J., Condamine, F. L., Lebedev, V., Bannikova, A., Quéré, J. P., Shenbrot, G. I., Michaux, J. R.,  
354 2015. Out of Himalaya: the impact of past Asian environmental changes on the evolutionary and  
355 biogeographical history of Dipodoidea (Rodentia). *J. Biogeogr.* 42(5): 856-870.
- 356 Poux, C., Madsen, O., Glos, J., De Jong, W. W., Vences, M., 2008. Molecular phylogeny and divergence  
357 times of Malagasy tenrecs: influence of data partitioning and taxon sampling on dating  
358 analyses. *BMC Evol. Biol.* 8(1): 102.
- 359 Roesler, U., Witte, G. R., 1968. Chorologische Betrachtungen zur Subspecies bildungeinger Vertebraten  
360 im Italienischen und balkanischen Raum. *Zool. Anz.* 182: 25-71.
- 361 Ronquist, F., Teslenko, M., Van Der Mark, P., Ayres, D. L., Darling, A., Höhna, S., Larget, B., Liu,  
362 L., Suchard, M. A., Huelsenbeck, J. P., 2012. MrBayes 3.2: efficient Bayesian phylogenetic  
363 inference and model choice across a large model space. *Syst. Biol.* 61(3): 539-542.
- 364 Salvi, D., Harris, D. J., Kaliontzopoulou, A., Carretero, M. A., Pinho, C., 2013. Persistence across  
365 Pleistocene ice ages in Mediterranean and extra-Mediterranean refugia: phylogeographic insights  
366 from the common wall lizard. *BMC Evol. Biol.* 13(1): 147.
- 367 Salvi, D., Lucente, D., Mendes, J., Liuzzi, C., Harris, D. J., Bologna, M. A., 2017. Diversity and  
368 distribution of the Italian Aesculapian snake *Zamenis lineatus*: A phylogeographic assessment with  
369 implications for conservation. *J. Zool. Syst. Evol. Res.* 55(3): 222-237.
- 370 Simonsen, T. J., Huemer, P., 2014. Phylogeography of *Hepialushumuli* (L.) (Lepidoptera: Hepialidae) in  
371 Europe: short distance vs. large scale postglacial expansions from multiple Alpine refugia and  
372 taxonomic implications. *Insect Syst. Evol.* 45(3): 209-250.
- 373 Stephens, M., Donnelly, P., 2003. A comparison of bayesian methods for haplotype reconstruction from  
374 population genotype data. *Am. J. Hum. Genet.* 73(5): 1162-1169.
- 375 Thompson, J. D., Gibson, T. J., Plewniak, F., Jeanmougin, F., Higgins, D. G., 1997. The CLUSTAL\_X  
376 windows interface: flexible strategies for multiple sequence alignment aided by quality analysis  
377 tools. *Nucleic. Acids. Res.* 25(24): 4876-4882.
- 378 Toews, D. P., Brelsford, A., (2012). The biogeography of mitochondrial and nuclear discordance in  
379 animals. *Mol. Ecol.* 21(16): 3907-3930.
- 380 Von Lehmann, E., 1964. Eine kleinsäuger aus beute wom Aspromonte (Kalabrien). *Sitzungsber. Ges.*  
381 *Natuforsch. FreundeBerlin* (n.F.), 4: 31-47.

382 Wauters, L. A., Amori, G., Aloise, G., Gippoliti, S., Agnelli, P., Galimberti, A., Casiraghi, M., Preatoni,  
383 D., Martinoli, A., 2017. New endemic mammal species for Europe: *Sciurus meridionalis* (Rodentia,  
384 Sciuridae). *Hystrix* 28(1).

385

386

387

388

389

390

391

392

393

394

395

396

397

398

399

400

401

402

403

404

405

406

407

408

409

410

411

412

413 **Tables**

414 **Table1.** Geographic location of the 15 samples of *Dryomysnitedula* analysed in this study.

| Sample | Source                   | Code      | Locality                   | Longitude (E) | Latitude (N) | Altitude (m) |
|--------|--------------------------|-----------|----------------------------|---------------|--------------|--------------|
| 1      | This study               | ASP1      | Montalto                   | 15.908        | 38.159       | 1825         |
| 2      | This study               | ASP2      | Tre Limiti                 | 15.859        | 38.137       | 1600         |
| 3      | This study               | SL1       | Macchiad'Orso              | 16.646        | 39.129       | 1624         |
| 4      | This study               | SL2       | Monte Gariglione           | 16.642        | 39.132       | 1669         |
| 5      | This study               | SL3       | Monte Gariglione           | 16.642        | 39.132       | 1669         |
| 6      | This study               | SL4       | Monte Gariglione           | 16.642        | 39.132       | 1669         |
| 7      | This study               | SL5       | Monte Gariglione           | 16.642        | 39.132       | 1669         |
| 8      | This study               | SL6       | Monte Gariglione           | 16.642        | 39.132       | 1669         |
| 9      | Science Museum of Trento | MTSN 1120 | ForestaDemaniale di Cadino | 11.403        | 46.190       | 1650         |
| 10     | Science Museum of Trento | MTSN 1121 | ForestaDemaniale di Cadino | 11.406        | 46.191       | 1600         |
| 11     | Science Museum of Trento | MTSN 1122 | ForestaDemaniale di Cadino | 11.406        | 46.191       | 1600         |
| 12     | Science Museum of Trento | MTSN 1123 | ForestaDemaniale di Cadino | 11.389        | 46.214       | 1850         |
| 13     | Science Museum of Trento | MTSN 1124 | ForestaDemaniale di Cadino | 11.390        | 46.217       | 1800         |
| 14     | University of Padova     | ALB 2379  | Val di Fiemme              | 11.738        | 46.306       | 1510         |
| 15     | University of Padova     | ASD4      | Asiago                     | 11.516        | 45.967       | 1700         |

415

416



417 **Table 2.** Mean sequence divergence (maximum-likelihood estimate) within and between the main groups  
418 of haplotypes recovered by the phylogenetic analyses carried out among the *D. nitedula* samples analysed  
419 in the present study. Standard errors are given in brackets.

| <b>Level of variation</b> | <b>Geographic region</b> | <b><i>CYTB</i></b> | <b><i>GHR</i></b> | <b><i>IRBP</i></b> | <b><i>RAG1</i></b> |
|---------------------------|--------------------------|--------------------|-------------------|--------------------|--------------------|
| <i>Within groups</i>      | North-eastern Italy      | 0.001              | 0.006             | 0.007              | 0.002              |
|                           |                          | (0.000)            | (0.001)           | (0.001)            | (0.000)            |
|                           | Southern Italy           | 0.003              | 0.002             | 0.001              | 0.002              |
|                           |                          | (0.000)            | (0.000)           | (0.000)            | (0.000)            |
| <i>Between groups</i>     |                          | 0.044              | 0.009             | 0.013              | 0.005              |
|                           |                          | (0.000)            | (0.000)           | (0.000)            | (0.000)            |

420

421

422

423

424

425

426

427

428

## Figure legends

429

430

**Figure 1. A)** Geographic location of the *Dryomys nitedula aspromontis* samples analysed for the present

431

study; localities are numbered as in Table 1. **B)** Geographic distribution of *Dryomys nitedula* in Europe

432

and neighbouring regions (redrawn from Juškaitis, 2014). **C)** Geographic location of the *Dryomys*

433

*nitedula intermedius* samples analysed for the present study; localities are numbered as in Table 1. **D-G)**

434

Phylogenetic trees inferred for the four gene fragments analysed based on a Bayesian inference

435

procedure; numbers indicate Bayesian posterior probabilities.

436

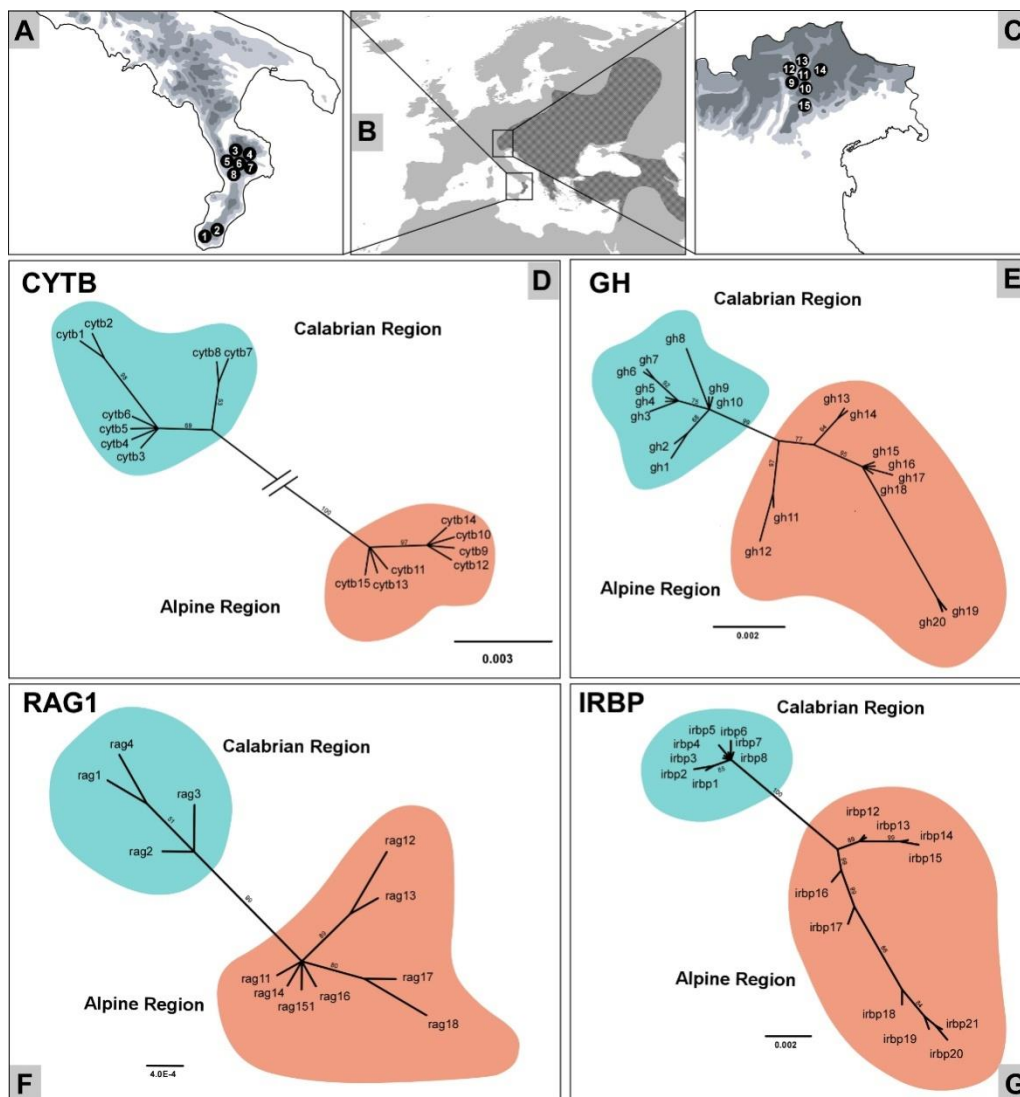

437

438

439

440 **Figure 2.** Pictures of the two subspecies of *Dryomy snitedula* inhabiting the Italian peninsula. **A)**  
441 *Dryomys nitedula aspromontis* (Monte Altare Longobucco; Photo credit: A. Pellegrino). **B)** *Dryomy*  
442 *snitedula intermedius* (Photo credit: L. Lapini).  
443

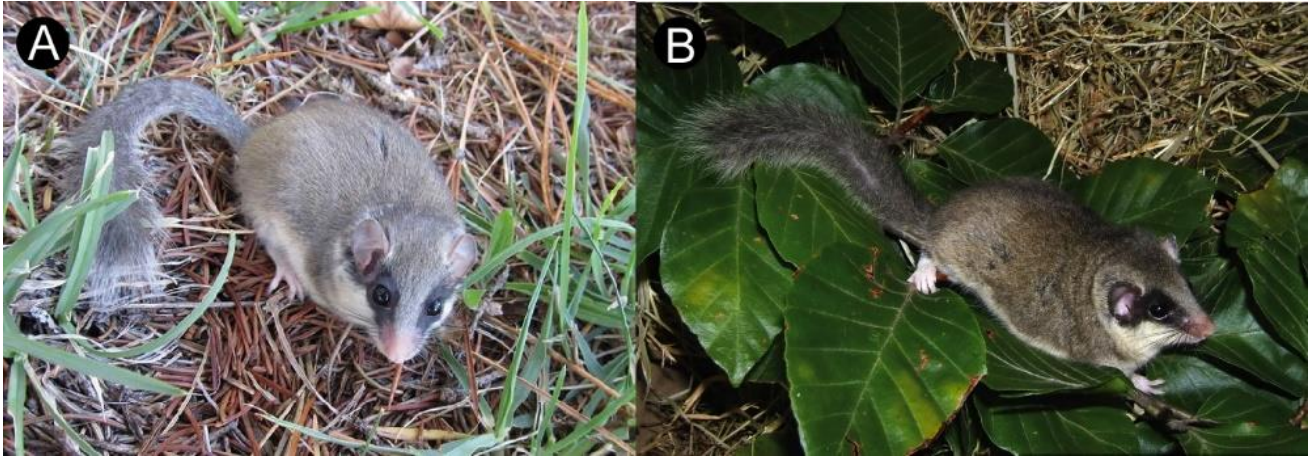

444
